# Supplementary material for: Expression of the chrXq27.3 miRNA cluster in recurrent ovarian clear cell carcinoma and its impact on cisplatin resistance
Source: PubMed Central journal article supplement (PMC7892337; doi:10.1038/s41388-020-01595-3), 2021-01-08

## Supplementary Fig. S1

### A

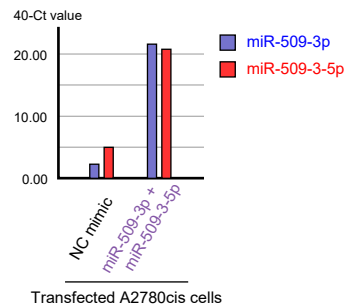

### B

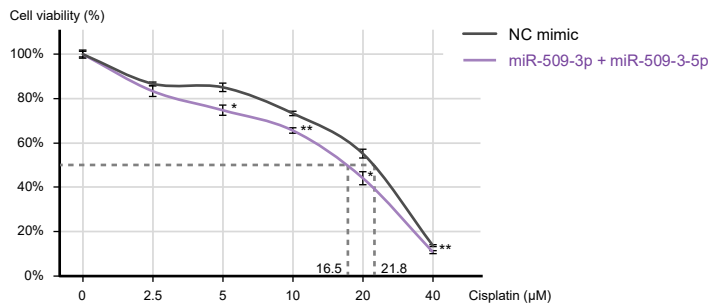

### C

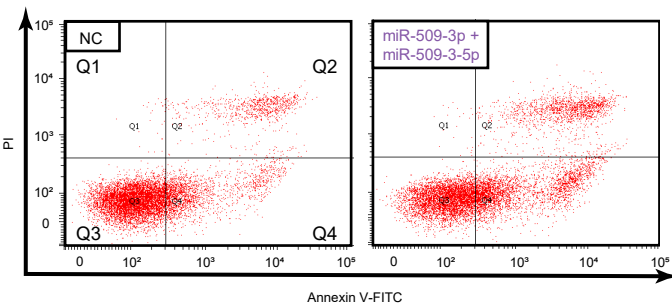

Cisplatin 20  $\mu\text{M}$  48h treatment

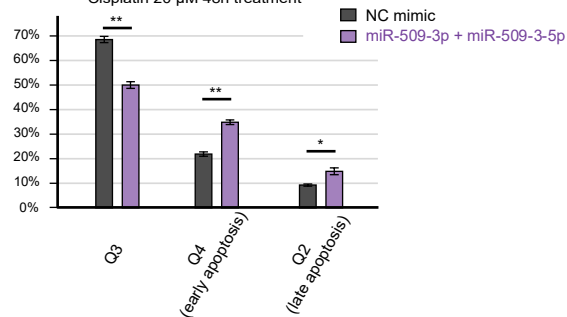

### D

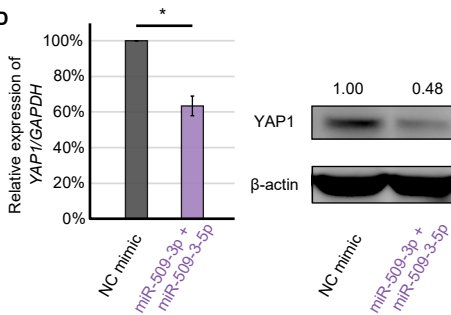

### E

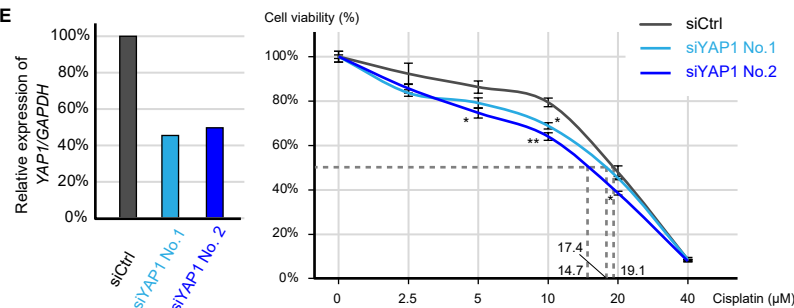

Supplement: 41388_2020_1595_MOESM2_ESM.pdf [file 41388_2020_1595_MOESM2_ESM.pdf]
