# Supplementary material for: Expression of the chrXq27.3 miRNA cluster in recurrent ovarian clear cell carcinoma and its impact on cisplatin resistance
Source: PubMed Central journal article supplement (PMC7892337; doi:10.1038/s41388-020-01595-3), 2021-01-08
Supplement: 41388_2020_1595_MOESM3_ESM.pdf [file 41388_2020_1595_MOESM3_ESM.pdf]

## Supplementary Fig. S2

**A**

| Name                     | Sequence                |
|--------------------------|-------------------------|
| Forward primer for YAP1  | AGAACAATGACGACCAATAGCTC |
| Reverse primer for YAP1  | GCTGCTCATGCTTAGTCCAC    |
| Forward primer for GAPDH | AAATGGGGTGAGGCCGGT      |
| Reverse primer for GAPDH | ATTGCTGACAATCTTGAGTGA   |

**B**

### For miRNA

| Step              | Temp. | Time   | Cycles |
|-------------------|-------|--------|--------|
| Enzyme activation | 95°C  | 10 min | 1      |
| Denature          | 95°C  | 15 s   | ] 40   |
| Anneal/Extend     | 60°C  | 60 s   |        |

### For mRNA

| Step              | Temp. | Time | Cycles |
|-------------------|-------|------|--------|
| Enzyme activation | 95°C  | 30 s | 1      |
| Denature          | 95°C  | 5 s  | ] 40   |
| Anneal/Extend     | 60°C  | 30 s |        |
